# Supplementary material for: In vivo functional analysis of the Dicistroviridae intergenic region internal ribosome entry sites
Source: PubMed Central journal article supplement — Nucleic Acids Res. 2011 Jun 6;39(16):7276–88. doi: 10.1093/nar/gkr427 (PMC3167618; doi:10.1093/nar/gkr427), 2011-06-06
Supplement: supp_gkr427_Supplemental_material_final.pdf [file supp_gkr427_Supplemental_material_final.pdf]

## Supplemental Text

### Materials and Methods

#### *Northern analysis*

Poly(A) RNA was isolated from yeast transformed with the CrPV, IAPV or TSV IGR IRES dual luciferase reporter using the oligotex kit (Qiagen). The RNA was separated on a denaturing agarose gel (0.8% agarose, 16% formaldehyde) in MOPS buffer (20 mM MOPS, 5 mM NaOAc, 1 mM EDTA at pH7.0) and transferred to a zeta-probe membrane (Bio-Rad). The  $\alpha^{32}\text{P}$ -dCTP (PerkinElmer) radiolabeled firefly luciferase probe was generated using the prime-a-gene kit (Promega) and the SphI-Aval fragment of the firefly luciferase gene (bases 403-1062) served as the template.

### Results

#### *Monocistronic transcripts are generated from the dicistronic reporter*

The northern analysis demonstrates that in yeast cells transformed with the dual luciferase reporter that, in addition to the full length dicistronic message, a transcript is present that contains firefly luciferase that is the approximate size for a monocistronic transcript. This suggests that a functional firefly luciferase could be synthesized from the monocistronic message if there is an in frame upstream start codon contained within the IGR IRES. Because the monocistronic transcript is observed in all dicistronic reporters regardless of the IRES inserted we suspect that the cryptic promoter lies within the *Renilla* coding region.

#### *PKIII mutant*

In the crystal structure of the PSIV IGR IRES, SL2.3 bends upward and juxtaposes SL2.1 (1). Based on the Cryo-EM data of the ribosome bound to the IGR IRES, these terminal loop regions are predicted to interact directly with the 40S subunit (2,3). Mutagenesis data are consistent with the structural data and suggest that SL2.1 and SL2.3 are necessary for recruiting the 40S ribosome (4,5). Therefore, if these loops are not properly positioned the IGR IRES may be unable to bind to the ribosome. The published IAPV sequence has the propensity to form an extended PKIII which could lock SL2.3 into the down position (Figure S2A, dashed lines). To test if this is partially responsible for the decreased IRES activity of IAPV in yeast, a linker mutant uc6486aa, was created that prohibits interaction between the stem of SL2.3 and the linker region upstream of PKIII (Figure S2A, upper gray box). This mutant did not increase activity of the wild-type IAPV IGR IRES or the more active IAPV<sub>gcu</sub> in yeast suggesting that the proposed extension of PKIII did not affect IRES activity (Figure S2B). Mfold calculations of the IAPV IRES routinely paired the bases of PKIII but did not predict an extension outward suggesting that it is unlikely an extension of PKIII was occurring *in vivo* even with available base-pairing interactions (6). These data suggest that the most likely difference between the IAPV IGR IRES and the closely related ABPV and KBV IRESs is due to the

sequence of the first codon of ORF2 rather than structural disturbances in the IRES.

### Supplementary Figure Legends

**Figure S1:** Northern analysis demonstrates IGR IRES plasmids have cryptic promoter activity in yeast. **(A)** Short exposure allows visualization of the dicistronic message. **(B)** Overexposure of the same blot allows visualization of small monocistronic bands. RiboRuler (Fermentas) molecular weight markers are indicated (left) and the transcripts based on size of the dicistronic and firefly luciferase monocistronic messages are indicated to the right of the blots.

**Figure S2:** The sequence in the linker region between the first stem and PKIII does not affect IAPV IGR IRES activity. **(A)** A diagram of the IAPV<sub>uc6486aa</sub> mutation that was engineered into either the wild-type IAPV IGR IRES or the more active IAPV<sub>gcu</sub> to prohibit extension of PKIII. **(B)** Translational activity of the mutants were assessed in wild-type yeast and normalized to the control constructs without the linker mutation.

**Figure S3:** Temperature differences do not affect *Renilla* luciferase values in yeast. The *Renilla* luciferase values from all IGR IRES dicistronic reporters in Figure 6A. Error bars represent SE for n=11.

### References

1. Pflugsten, J.S., Costantino, D.A. and Kieft, J.S. (2006) Structural basis for ribosome recruitment and manipulation by a viral IRES RNA. *Science*, 314, 1450-1454.
2. Spahn, C.M., Jan, E., Mulder, A., Grassucci, R.A., Sarnow, P. and Frank, J. (2004) Cryo-EM visualization of a viral internal ribosome entry site bound to human ribosomes: the IRES functions as an RNA-based translation factor. *Cell*, 118, 465-475.
3. Schuler, M., Connell, S.R., Lescoute, A., Giesebrecht, J., Dabrowski, M., Schroer, B., Mielke, T., Penczek, P.A., Westhof, E. and Spahn, C.M. (2006) Structure of the ribosome-bound cricket paralysis virus IRES RNA. *Nat Struct Mol Biol*, 13, 1092-1096.
4. Nishiyama, T., Yamamoto, H., Shibuya, N., Hatakeyama, Y., Hachimori, A., Uchiumi, T. and Nakashima, N. (2003) Structural elements in the internal ribosome entry site of Plautia stali intestine virus responsible for binding with ribosomes. *Nucleic Acids Res*, 31, 2434-2442.
5. Costantino, D. and Kieft, J.S. (2005) A preformed compact ribosome-binding domain in the cricket paralysis-like virus IRES RNAs. *RNA*, 11, 332-343.
6. Zuker, M. (2003) Mfold web server for nucleic acid folding and hybridization prediction. *Nucleic Acids Res*, 31, 3406-3415.

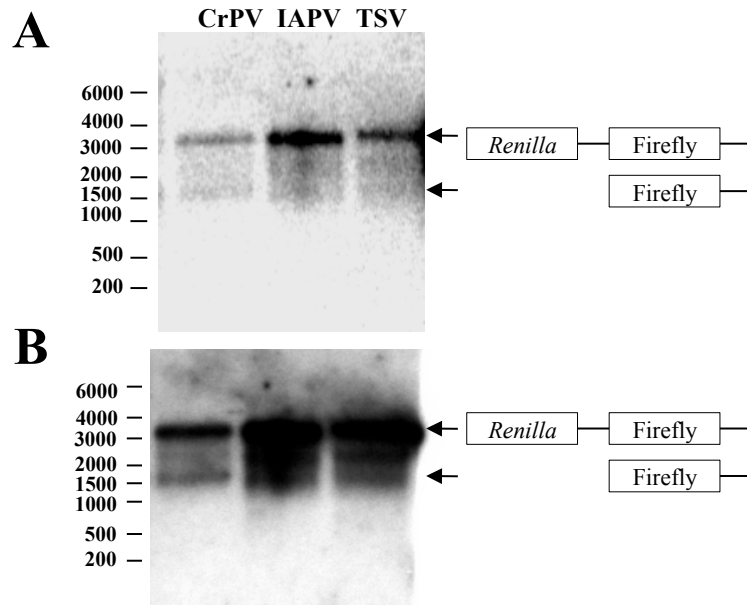

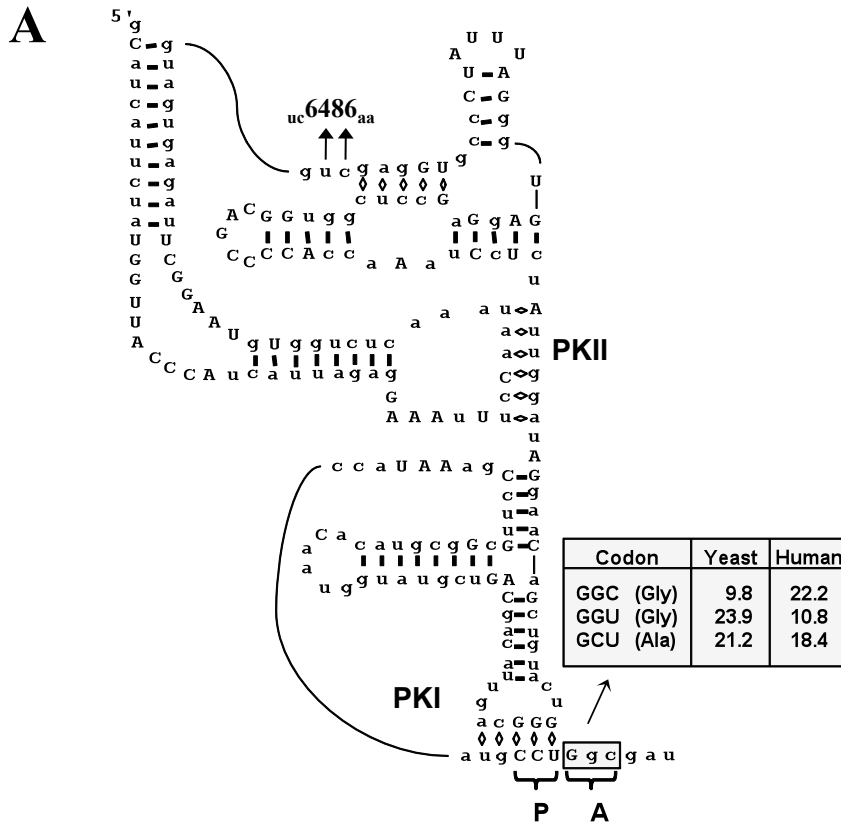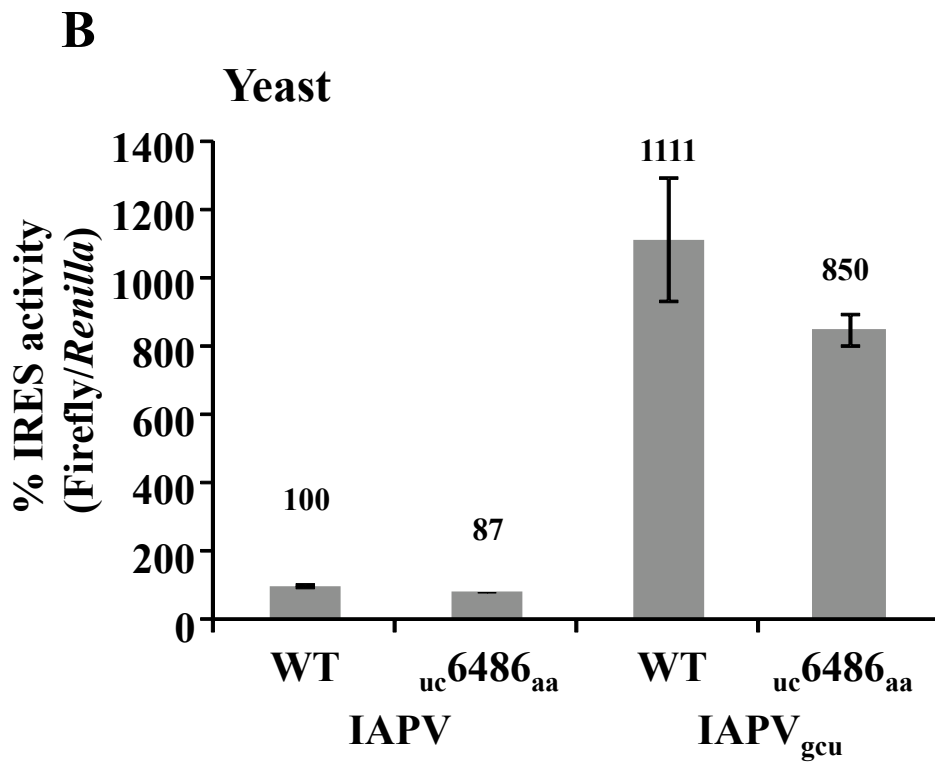

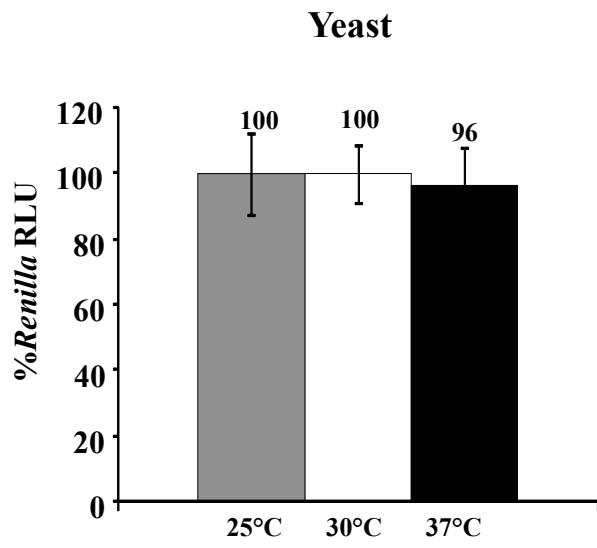

**Table S1**

| Primer Set          | #   | Sense                                            | Antisense                                    |
|---------------------|-----|--------------------------------------------------|----------------------------------------------|
| Insert SacII        | P1  | CTACATTTCAAGATACCGCGGAAGACGCCAAAACAT             | ATGTTTTGGCGTCTTCCGGGGTATCTTGAATGTAG          |
| HjPV                | P2  | ctcgagTGAGAGTTTCAAAACATTGTGC                     | ccgcggaATTATTATTATTATTGCTAGTG                |
| HoCV-1              | P3  | ctcgagGACGAGGAGTAAGTGTGAAC                       | ccgcggtTTTGTGTGATGTTGCGAGCTGG                |
| PSIV                | P4  | ctcgagCGACACCGCGCTTCCAAGC                        | ccgcggaAAAATCTTTTTCTTGAAGTG                  |
| ABPV                | P5  | ctcgagGTAATTTGGGAATCGCAACAC                      | ccgcggtTTGTTTCTTGATCGCGCAGGTATG              |
| IAPV                | P6  | ctcgagGTATAGTGTCTGGAGGC                          | ccgcggtTTGAATCGCCAGGCATGGTATTTG              |
| KBV                 | P7  | ctcgagATATAACTTGGATGCACGTGTTTTCATGTTACCC         | ccgcggtTTTCTTGGTATCAGCAGGTATGG               |
| KBV flank           | P8  | GGATATGCTCAGGAGCGGTATC                           | CCTTCTCAATGGCATTCTCCGC                       |
| SINV-1              | P9  | ctcgagAACGTTTCTTCTCTGG                           | ccgcggtATTGTTGATTGAG                         |
| TSV                 | P10 | ctcgagTAGCACACCCCGATCGTAAACTCC                   | ccgcggtTTTCAACTGGGTTAGCAGGC                  |
| CrPV ΔSacII         | P11 | CATTTCAAGATACCGAAGACGCCAAAAC                     | CTTTATGTTTTGGCGTCTTCCGGTATCTTGAATGTAGCAG     |
| HjPV ΔSacII         | P12 | AATTTCACTAGCAATAATAAATTCGGAAGACGCCAAAACATAAGAAAG | CTTTTATGTTTTGGCGTCTTCCGGTATCTTGAATGTAGCAG    |
| HoCV1 ΔSacII        | P13 | CAACATCAACAACCCGAAGACGCCAAAAC                    | GTTTTGGCGTCTTCCGGTGTGTTGATGTTGCG             |
| PSIV ΔSacII         | P14 | TCTCACTTCAAGAAAAGAAATTTACCGAAGACGCCAAAACATAAA    | TTTTATGTTTTGGCGTCTTCCGGTAAATCTTTTTCTTGAAGTGA |
| ABPV ΔSacII         | P15 | GCCGATCAAGAAAACACCCGAAGACGCCAAAACATA             | TATGTTTTGGCGTCTTCCGGTGTGTTCTTGCATCGGC        |
| IAPV ΔSacII         | P16 | GGCGATTCAACAACAACCCGAAGACGCCAAAAC                | CTTTATGTTTTGGCGTCTTCCGGTGTGTTGGAATCGCC       |
| KBV ΔSacII          | P17 | GATAACCAAGAAACCCGAAGACGCCAAAAC                   | GTTTTGGCGTCTTCCGGTCTTCCGGTATC                |
| SINV1 ΔSacII        | P18 | CCTGCTCAATCAACAATACCGAAGACGCCAAAACATA            | TATGTTTTGGCGTCTTCCGGTATGTTTGAATGAGCAGC       |
| TSV ΔSacII          | P19 | CTAACCCAGTTGAAACGGGAAGACGCCAAAAC                 | GTTTTGGCGTCTTCCGGTCTTCAACTGGGTTAG            |
| IAPV_GCU            | P20 | GAAATACCATGCCTGCTGATTCACAACAACC                  | GGTTTGTGTAATCAGCAGGCATGGTATTTCC              |
| KBV_GGC             | P21 | GTTTCGAAATACCATACCTGGCGATAACCAAGAAACCCGAAG       | CTTCCGGTCTTCCGGTATCAGCAGGCATGGTATTTCCGAAAC   |
| IAPV_GGU            | P22 | GAAATACCATGCCTGGTGAATTCACAACAACC                 | GGTTTGTGTAATCAGCAGGCATGGTATTTCC              |
| IAPV 6486aa         | P23 | GTAAGGCTTAGAGTGATGGAAGAGGTGCCCTATTTTAGGG         | CCCTAAATAGGGCACCTCTTCCATCACTTAAGCCCTTAC      |
| Fluc Rev            | P24 |                                                  | CAGCGTAAAGTGATGTCCACCT                       |
| <b>PKI analysis</b> |     |                                                  |                                              |
| HoCV1 cu-ga         | P25 | CATCATTAGACACGAGACGCAACATCACAACAACC              | GTTTTGTTGATGTTGCGTCTGCTGTTCTCTAATGATG        |
| HoCV1 ag-uc         | P26 | GTGGACTGGTGGAGATTGCTTGACCTCATCATTAGAGA           | TCTCTAATGATGAGGTCAAGACAATCTCACCAGTCCAC       |
| KBV cc-gg           | P27 | ACATATTCGGCGTTTCAAAATACCATAGGTGCTGATAACCAAAG     | CTTGGTTATCAGCACCTATGGTATTTCCGAAACGCCGAATATGT |
| KBV gg-cc           | P28 | GATAGAAACCGCTATATCGCTAGCTATAGCAGTCCGGATA         | TATCCGACTGCTATAGTACGGGATATAGCGGTTCTATC       |
| TSV cc-gg           | P29 | CGTGGTGGACTAATTAATGGGTGCTAACCCAGTTGAAAC          | GTTTCAACTGGTGTAGCACCCATTAATTAAGTCCACCACG     |
| TSV gg-cc           | P30 | AGTCCCAGTCACTTTGCCCAAAGTAGACACGCCCG              | GCGGCTGTCTACTTTGGCAAAGTACTGGGACT             |
| TSV aug-uga         | P31 | GGTGGGACTTAATTTATGACCTGCTAACCCAGTTG              | CTGGGTTAGCAGGTCAATAAATTAAGTCCACC             |
| TSV ca-uc           | P32 | TCCCAGTCACTTTGGTCAAGTAGACAGCCCGC                 | GCGGCTGTACTTGAACCCCAAAGTACTGGGA              |
| HjPV cu-ga          | P33 | AGGCTAAAGAAATTTCAAGACAAATAATAAATTC               | GAATTAATTAATTTGCTTCTGAAATCTTTAGCC            |
| HjPV ag-uc          | P34 | CCTAGGTGCGAGCCTGTAGTTTTTCTGGACTTTAGGCTAA         | TTAGCCCTAAAGTCCAGAAAACATAAGGCTGCACCTAGG      |
| PSIV cu-ga          | P35 | GCAGAAAGAACTCTCAGATCAAGAAAAGAAATTTAC             | GTAATTTCTTTTCTTGATCTGAGATCTTTTTCGC           |
| PSIV ag-uc          | P36 | CTCGTCAAACTTATCTGGTGTGCGAAAAG                    | TTCCGACAACCAAGATAATGTTTGAGCGGAGTAC           |
| KBV cc-gg           | P37 | ACATATTCGGCGTTTCAAAATACCATAGGTGCTGATAACCAAAG     | CTTGGTTATCAGCACCTATGGTATTTCCGAAACGCCGAATATGT |
| KBV gg-cc           | P38 | GATAGAAACCGCTATATCGCTAGCTATAGCAGTCCGGATA         | TATCCGACTGCTATAGTACGGGATATAGCGGTTCTATC       |
| IAPV cc-gg          | P39 | GCGTCCGAAATACCATGGTGGCGATTCACAACAACC             | GTTTGTGTAATCGCCACCCATGGTATTTCCGAAACGC        |
| IAPV gg-cc          | P40 | GATAGAACAGCTGTACTGCCAGTTACAGCAGTCTGTATG          | CATACGACTGCTGTAAGTGGCAAGTACAGCTGTTCTATC      |
| IAPV aug-uga        | P41 | GGCGTCCGAATACCTGACCTGGCGATTCACAAC                | GTTGTGAATCGCCAGGTAAGTATTTCCGAAACGCC          |
| IAPV ca-uc          | P42 | GAAAGCTGTACTGGGtGTTACAGCAGTCTGTATG               | CATACGACTGCTGTAAAGTCCCAAGTACAGCTGTTCC        |
| ABPV cc-gg          | P43 | GAATGCAGCGTTCCGAAATACCATAGGTGCCAGTCAAGAA         | TTCTTGTATCGGCACCTATGGTATTTCCGAAACGCCCTATTC   |
| ABPV gg-cc          | P44 | GGATAGGAACAGCTATATGCTTAGTTGTAGCAGTTGATTC         | GAATACAACTGTACAACCTAGGCAATATAGCTGTTCCCTATCC  |
| SINV cc-gg          | P45 | GTTCCGAAATACCCAAAGGTGCTCAATCAACAATAAC            | GTAATGTTTGTGATGAGCACCTTTGGGATTTCCGAAAC       |
| SINV gg-cc          | P46 | GACTAGGAACAGCTATATCGcTTGCTATAGCAGTCCAGG          | CCTGACTGCTATAGCAAGGCGATATAGCTGTTCCCTAGTC     |
